# Supplementary material for: Aromatase inhibitors and risk of cardiovascular events in breast cancer patients: a systematic review and meta-analysis
Source: PubMed Central journal article supplement (PMC6820915; doi:10.1186/s40360-019-0339-1), 2019-10-29
Supplement: 40360_2019_339_MOESM3_ESM.pdf [file 40360_2019_339_MOESM3_ESM.pdf]

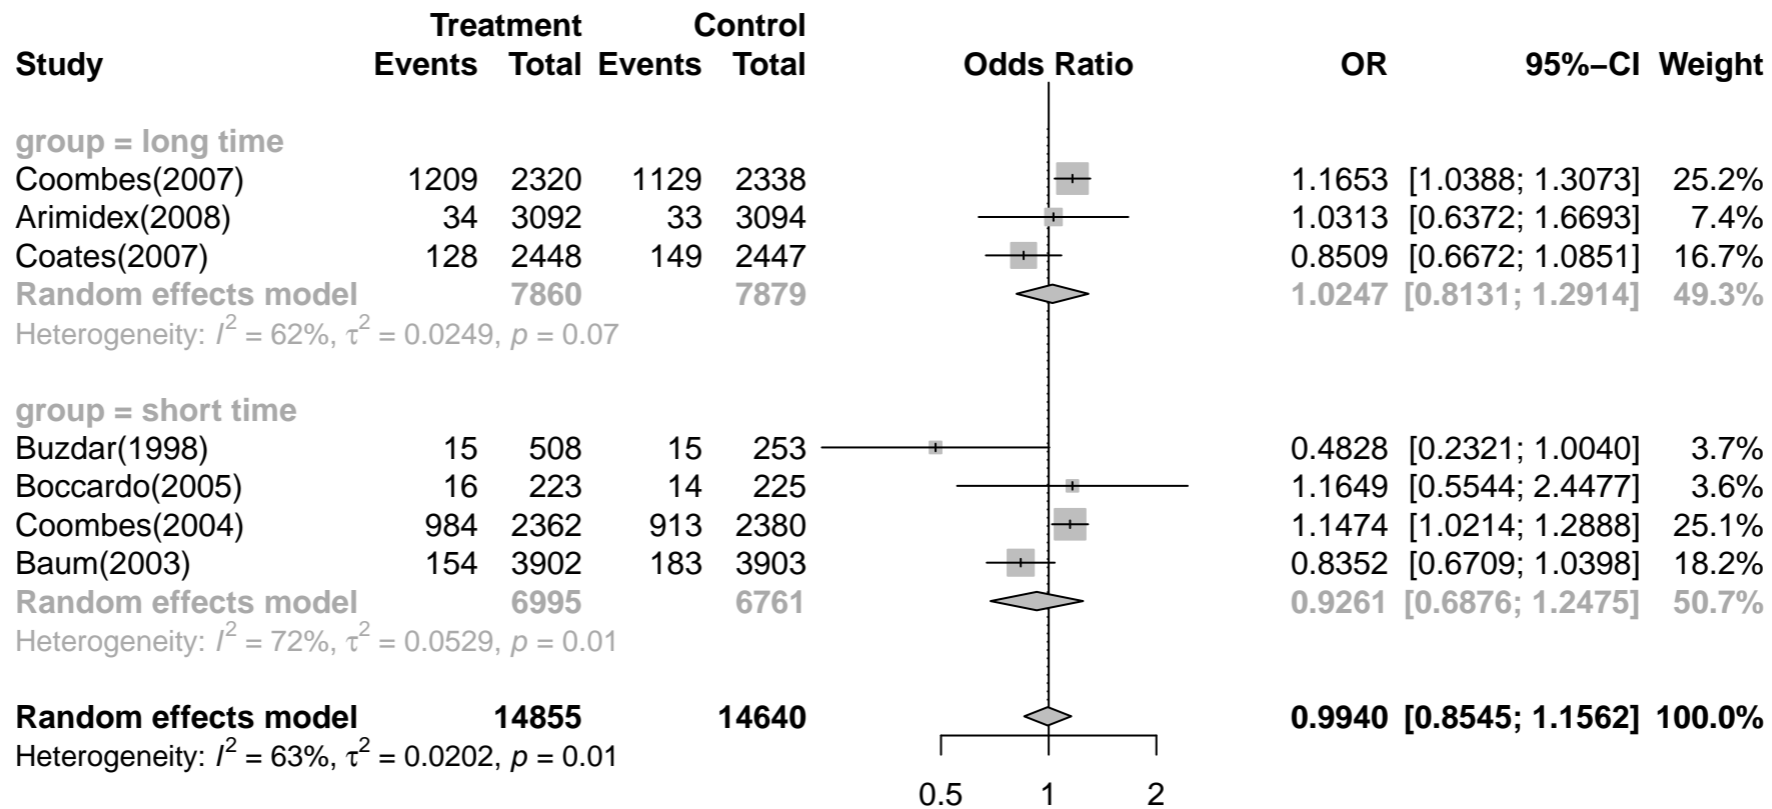

Figure S3. Sub-group analysis of the incidence of CVEs between long time and short time follow-up periods.
